# Supplementary material
Source: Springer Nature journal article supplement (https://www.springermedizin.de/resource/supplementary/13058_2011_2921_MOESM6_ESM.pdf/9702836)

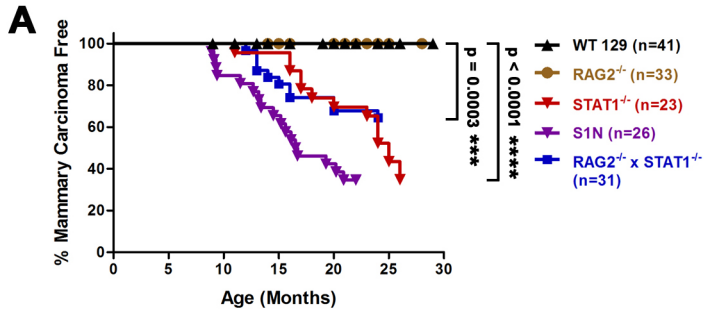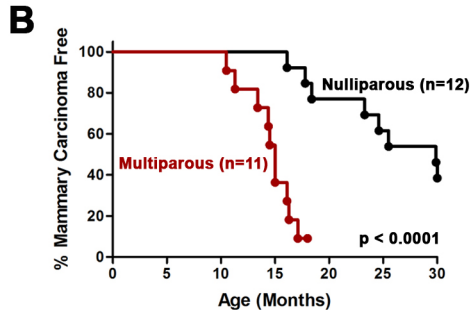

Supplement: MOESM6 [file 9702836]
